1 The effects of host availability and fitness on *Aedes albopictus* blood feeding patterns in New  
2 York

3 Kara Fikrig\*<sup>1</sup>, Elisabeth Martin<sup>1</sup>, Sharon Dang<sup>1</sup>, Kimberly St Fleur<sup>1</sup>, Henry Goldsmith<sup>1</sup>, Sophia  
4 Qu<sup>1</sup>, Hannah Rosenthal<sup>1</sup>, Sylvie Pitcher<sup>1</sup>, and Laura C. Harrington<sup>1</sup>

5 <sup>1</sup>Entomology Department, Cornell University

6 [\\*kmfikrig@gmail.com](mailto:kmfikrig@gmail.com), 203-738-9317

7

8 Key Words: blood meal, mosquito, survival, fecundity, aspirator collections

9 Abstract word count: 249

10 Text word count: 7602

11 Figures: 5

12 Tables: 6

13 Supplementary Material: 1

14

15

16

17

18

19

20

## 21 Abstract

22 *Aedes albopictus* is a competent vector of numerous pathogens, representing a range of  
23 transmission cycles involving unique hosts. Despite the important status of this vector, variation  
24 in its feeding patterns is poorly understood. We examined the feeding patterns of *Ae. albopictus*  
25 utilizing resting collections in Long Island, New York, and contextualized blood meal sources  
26 with host availability measured by household interviews and camera traps. We identified 90  
27 blood meals, including 29 human, 22 cat, 16 horse, 12 opossum, 5 dog, 2 goat, and 1 rabbit, rat,  
28 squirrel and raccoon. Our study is the first to quantitatively assess *Ae. albopictus* feeding patterns  
29 in the context of host availability of wild animals in addition to humans and domestic animals.  
30 Host feeding indices showed that cats and dogs were fed upon disproportionately often compared  
31 to humans. Forage ratios suggested a tendency to feed on cats and opossums and to avoid  
32 raccoons, squirrels, and birds. This feeding pattern was different from another published study  
33 from Baltimore, where *Ae. albopictus* fed more often on rats than humans. To understand if these  
34 differences were due to host availability or mosquito population variation, we compared the  
35 fitness of Long Island and Baltimore *Ae. albopictus* after feeding on rat and human blood. In  
36 addition, we examined fitness within the Long Island population after feeding on human, rat, cat,  
37 horse, and opossum blood. Together, our results do not show major mosquito fitness differences  
38 by blood hosts, suggesting that fitness benefits do not drive Northeastern *Ae. albopictus* feeding  
39 patterns.

40

## 41 **Introduction**

42 *Aedes albopictus* is a globally invasive mosquito of human and veterinary health importance.

43 This species is capable of transmitting over 20 pathogens in laboratory assays<sup>1</sup>, and is a  
44 confirmed natural vector of dengue, Zika, and chikungunya viruses, and dog heart worm<sup>1,2</sup>.

45 *Aedes albopictus* is a suspected vector of numerous additional viruses, including Eastern equine  
46 encephalitis and West Nile due to virus detection in field-collected mosquitoes, although there is  
47 no direct evidence of transmission to humans yet<sup>1</sup>. These pathogens encompass vastly different  
48 transmission cycles, including anthroponoses (e.g. Zika: human to mosquito) and zoonoses (e.g.  
49 West Nile virus: primarily bird to mosquito to human; dog heartworm: dog or wild canid to  
50 mosquito). In light of the broad vector potential of *Ae. albopictus* and variation in feeding

51 patterns in nature, it is critical to perform host feeding studies in locations relevant to human and  
52 animal health risk.

53 Variation in mosquito host feeding patterns can be influenced by a number of factors  
54 including innate host preference, environmental conditions, host availability, and the design of  
55 the studies themselves. These factors may explain the variation in host feeding reported for *Ae.*  
56 *albopictus* in the literature.

57 Published results for *Ae. albopictus* range from generalist or mammalophilic to highly  
58 anthropophagic (=human feeding) feeding patterns. For example, a high percentage of  
59 mosquitoes with human-derived blood meals were identified in tropical countries such as  
60 Thailand (100%) and Cameroon (99.4%)<sup>3,4</sup>. In Thailand, aspirator collections were conducted  
61 around human dwellings, however, in Cameroon, mosquitoes were collected at a leisure and  
62 equestrian center, both of which were surrounded by human dwellings. In some parts of the  
63 USA, human feeding frequency was much lower, such as at a tire dump in Missouri (6.5%),  
64 urban Baltimore, Maryland (13.6%), urban and rural sites in Hawaii (18.1%), and suburban  
65 North Carolina (20%)<sup>5,6,7,8</sup>. Additional studies have reported moderate human feeding rates  
66 such as in urban and peripheral sites in Brazil, urban and suburban Japan, and suburban New  
67 Jersey, USA<sup>9,10,11</sup>. Of those populations that did not feed predominantly on humans, most fed on  
68 a diverse array of animals, with the exception of Baltimore, where a striking number of *Ae.*  
69 *albopictus* fed on rats (72.3%)<sup>6</sup>.

70 One notable consistency amongst all published studies (with a sample size over 75) is a  
71 tendency for *Ae. albopictus* to feed primarily on mammals compared to birds and reptiles<sup>3,4,5,6,7,</sup>  
72 <sup>8,10,11,12,13,14,15,16,17,18</sup>. About half of studies report feeding on birds at low rates (1.7% to  
73 25.6% of all blood meals)<sup>5,7,8,11,13,14,16,17,18</sup>. A tendency to feed even sporadically on birds is

74 particularly important because of their role as amplifying hosts of arboviruses such as West Nile  
75 and Eastern equine encephalitis.

76 Host availability is rarely considered in the design of mosquito blood feeding studies  
77 despite its importance in driving mosquito blood feeding patterns and thus interpreting study  
78 results. In Italy, *Ae. albopictus* from urban and rural sites had replicable differences in feeding  
79 patterns, mirroring differences in host availability at these sites<sup>14</sup>. However, the authors only  
80 made qualitative note of site type and did not quantify host availability. We are aware of only  
81 two published studies (in North Carolina and Brazil) that have quantitatively assessed the link  
82 between host availability and blood feeding for *Ae. albopictus*<sup>8,13</sup>. Their results do not provide a  
83 clear picture of whether *Ae. albopictus* feeds disproportionately often on humans compared to  
84 other mammals, with results varying depending on measurement type, stratification level, and  
85 non-human animal in question.

86 In addition to host availability, host attraction may be a major driver influencing blood  
87 feeding patterns<sup>19</sup>. Unfortunately, only two published studies have explored host attraction in *Ae.*  
88 *albopictus*<sup>20,21</sup>. The authors reported higher attraction to humans compared to numerous other  
89 species including dogs and chickens. Preferential attraction to hosts is determined genetically,  
90 and may evolve as a result of elevated mosquito fitness after ingesting a given species' blood<sup>19</sup>.  
91 <sup>22</sup>. This has been demonstrated for *Ae. aegypti*, which maximizes reproductive fitness on human  
92 blood, its preferred host<sup>23</sup>. Only two studies have addressed the impact of blood from different  
93 species on *Ae. albopictus* egg production<sup>24,25</sup>, but none have compared both survival and  
94 fecundity using the most ecologically relevant hosts.

95 We sought to determine *Ae. albopictus* feeding patterns in suburban and farm landscapes  
96 along its front of active northward expansion in New York State<sup>26</sup>. Our aim was to investigate

97 these feeding patterns in the context of host availability and their consequences for mosquito  
98 fitness. Ultimately, we wanted to fill a gap in our understanding of *Ae. albopictus* feeding  
99 ecology along its Northeast USA range limit and how it might relate to public health risk. To  
100 rigorously address blood feeding patterns, we performed host censuses to calculate host feeding  
101 indices and forage ratios. We then assessed whether fitness of Long Island, NY *Ae. albopictus*  
102 varied by host blood species ingested in the laboratory through a series of life table studies. To  
103 explore population differences, we compared fitness of Long Island and Baltimore populations  
104 fed human and rat blood meals.

105

## 106 **Methods**

### 107 ***Field Sites***

108 Eight sites were selected in Suffolk County on Long Island, NY: four farms and four residential  
109 areas, each containing between nine and seventeen collection properties. *Ae. albopictus* has been  
110 present in Suffolk County since 2004, although its distribution is not uniform or complete across  
111 the county (Moses Cucura, pers comm). Residential sites were selected based on *Ae. albopictus*  
112 presence reported by the Suffolk County Vector Control and Arthropod-Borne Disease  
113 Laboratory and larval distribution data<sup>27</sup>. All residential sites were suburban, with variable  
114 human population density: Central Islip (1,853 people/sq km), Bay Shore (1,853 people/sq km),  
115 Babylon (1,660 people/sq km), and Hauppauge (734 people/sq km). All four farms were partially  
116 bordered by suburban residential and forested natural landscapes.

117

### 118 ***Collection***

119 Weekly collections were conducted at each site between 20 June and 15 August, 2018 with large  
120 custom-designed aspirators (30.5 cm diameter, 114 cm height, 12 V PM DC 2350 RPM, 1/35  
121 Horse power, 3.7 amp motor)<sup>3</sup>. One mosquito was collected with a hand net while host-seeking  
122 near collectors and was included in analysis because blood was partially digested upon  
123 collection. Mosquitoes were immobilized in acetone-treated jars (3 min) and sorted in the field to  
124 remove non-mosquito by-catch. The samples were transported on ice to the laboratory for  
125 identification according to a taxonomic key<sup>28</sup>. *Aedes albopictus* were considered engorged if  
126 blood was visible in the abdomen upon examination. Mosquitoes were stored at -20°C and  
127 transported to Cornell University on dry ice for blood meal identification.

128

#### 129 ***Blood Meal Identification:***

130 Abdomens were removed from mosquitoes using forceps and transferred to sterile  
131 microcentrifuge tubes. To avoid cross-contamination, forceps were dipped in ethanol and flame-  
132 sterilized between each sample. DNA was extracted from abdomens using Qiagen Puregene Cell  
133 kit (Qiagen Sciences, Germantown, MD, USA). To identify blood meals, we amplified templates  
134 from the vertebrate-specific cytochrome c oxidase subunit I (*COI*) “barcoding” gene. Primers  
135 designed by Reeves et al. (2018) were used to amplify a 395 base pair amplicon<sup>29</sup>(Table 1).

136 Table 1: Primer sequences designed by Reeves et al. (2018)

---

---

| <b>Primer Name</b> | <b>Sequence</b>                           |
|--------------------|-------------------------------------------|
| VertCOI_7194_F     | 5'- CGM ATR AAY AAY ATR AGC TTC TGA Y -3' |
| Mod_RepCOI_R       | 5'- TTC DGG RTG NCC RAA RAA TCA -3'       |

---

137

138 Other Reeves *COI* primers were not used due to co-amplification of *Ae. albopictus* DNA. Co-  
139 amplification is a recurrent issue with identifying *Ae. albopictus* blood meals due to matching  
140 sequences between its own genome and primers designed for use in blood meal studies of other  
141 mosquito species<sup>15</sup>. Notably, cytochrome b primers designed by Egizi et al. (2013) were used  
142 initially, but due to low success rate in our hands, we switched to the Reeves primers<sup>29</sup>. Three  
143 blood meals identified with the Egizi primers were not successfully amplified by the Reeves  
144 primers; results with both primer sets were combined for our data analysis.

145 PCR conditions were slightly modified from Reeves et al. (2018) in order to minimize  
146 co-amplification of *Ae. albopictus* DNA and maximize amplification of desired amplicon<sup>29</sup>.  
147 Reactions were performed with total volume of 20  $\mu$ L, consisting of 10  $\mu$ L of 2.0X Apex Taq  
148 RED Master Mix (Genesee Scientific Corp., San Diego, CA), 0.75  $\mu$ L of VertCOI\_7194\_F  
149 forward primer (10  $\mu$ M), 0.75  $\mu$ L of Mod\_RepCOI\_R reverse primer (10  $\mu$ M), 6.5  $\mu$ L sterile  
150 nuclease-free H<sub>2</sub>O, and 2  $\mu$ L of extracted DNA. Most reactions were conducted with the  
151 following thermocycling conditions: 94°C for 3 min, followed by 40 cycles of 94°C for 40 s,  
152 53.5°C for 30 s, and 72°C for 60 s, and a final extension step at 72°C for 7 min. The annealing  
153 temperature was modified from Reeves et al. (2018) in order to minimize amplification of *Ae.*  
154 *albopictus* DNA according to a temperature gradient test conducted on positive (human-fed) and  
155 negative (non-fed) mosquito controls. Conditions were further modified for a subset of reactions  
156 to optimize amplification: 94°C for 3 min, followed by 5 cycles of 94°C for 40 s, 45°C for 30 s,  
157 and 72°C for 60 s, and then 35 cycles of 94°C for 40 s, 48.5°C for 30 s, and 72°C for 60 s, and a  
158 final extension step at 72°C for 7 min. All reactions were conducted alongside a positive  
159 (human-fed mosquito) and negative (sterile nuclease-free water) control. PCR products (5  $\mu$ L)

160 were loaded onto a 1% agarose gel stained with gelRED, electrophoresed, and visualized with  
161 UV light (Mighty Bright, Hoefer Scientific Instruments, San Francisco, CA, USA).

162 Samples with positive bands after gel electrophoresis were purified with FastAP and  
163 Exonuclease (ThermoFisher Scientific, Waltham, MA, USA) and submitted for Sanger  
164 sequencing at the Cornell University Biotechnology Resources Center. Sequences were  
165 compared to the available database in NCBI Basic Local Alignment Search Tool (BLASTn) and  
166 were identified to a source if matches were  $\geq 98\%$  with a sequence of known origin (with the  
167 exception of an eastern gray squirrel (*Sciurus carolinensis*) sequence, which had a 95.5% match).

## 168 ***Host Availability***

### 169 *Household Interviews:*

170 To estimate host availability, household interviews were conducted weekly at time of collection  
171 (see Supplemental Materials S1). Residents were asked about the number of people and pets  
172 living in their house and the amount of time spent outside by species that day and the two days  
173 prior. Interviews were conducted in English or Spanish depending on homeowner preference.

### 174 *Camera Traps:*

175 Two motion-triggered camera traps (Moultrie M-880, #MCG-12691, Calera, AL, USA) were set  
176 at each site from 16 July to 13 August 2018 on selected properties in residential sites and  
177 different locations within farm sites. Cameras were operated according to the setting, height, and  
178 angle specifications described by Linske et al.<sup>30</sup>, with the exclusion of scent lures. Camera data  
179 were used to estimate host abundance by determining the number of animal encounters with the  
180 camera per trap day. If a given species was photographed within 30 min of the last image of that  
181 animal, it was considered the same individual and was not counted separately. If multiple



182 individuals were captured in one image within 30 min of last sighting, the count was equal to the  
183 maximum number captured together in an image.

184

### 185 *Fitness by Host Species*

186 **Mosquito Rearing:** Mosquitoes were collected from four towns on Long Island, NY and reared  
187 in colony for six to ten generations. Eggs from Baltimore, MD (between F<sub>3</sub> and F<sub>6</sub> depending on  
188 replicate) were reared synchronously with the Long Island colony in order to assess between  
189 population differences. For each replicate, eggs were vacuum hatched, provided with a pinch of  
190 pulverized fish food (crushed Cichlid Gold™ fish food pellets; Hikari, Himeji, Japan), and one  
191 day later, separated into trays of 200 larvae, with 1L of distilled water, and 4 Cichlid Gold™ fish  
192 food pellets. Adult mosquitoes were maintained in an environmental chamber (28°C, 71.9% ±  
193 9.5% relative humidity, 10 hr light, 10 hr dark, 2 hr dusk/dawn). Cups of 200 pupae were placed  
194 into cages inside the chamber, and upon eclosion, 10% sucrose was provided for 2-4 d. Males  
195 were removed and sucrose was replaced with distilled water for 1 d prior to blood feeding.

196 **Blood:** Human (Lampire Biologicals; Pipersville, PA, USA), opossum (The Janet L. Swanson  
197 Wildlife Health Center; Ithaca, NY, USA), rat (The Center for Animal Resources and Education,  
198 Cornell University), cat (The Center for Animal Resources and Education at Cornell University;  
199 Ithaca, NY, USA) and horse (Lampire Biologicals; Pipersville, PA, USA) blood treated with  
200 anticoagulant (sodium citrate) was stored at -20°C upon arrival. Blood was thawed in warm  
201 water immediately before use. Mosquito blood feeding was conducted with artificial feeders  
202 (water reservoir at 37°C and de-salted sausage casings as membrane) as described previously<sup>31</sup>.

203

204 *Within-population differences of Long Island Ae. albopictus*

205 In order to determine whether fitness advantages for different host blood sources influence  
206 feeding patterns of Long Island *Ae. albopictus*, we assessed fecundity and survival of females  
207 after feeding on human, cat, horse, opossum, and rat blood. These species were chosen based on  
208 commonly identified blood sources in our study or in Baltimore, MD<sup>6</sup>.

209 **Fecundity and Survival:** Fully engorged mosquitoes (approximately 35 per blood species per  
210 replicate and 3-4 replicates per group) were gently transferred individually into 0.5L paper cups  
211 with a dry oviposition vessel. Mosquitoes were maintained in the environmental chamber as  
212 described above. One day after blood feeding, strained larval rearing water was added to  
213 oviposition vessels to encourage egg lay. No additional water or sugar was provided. Each  
214 mosquito was checked daily for presence of eggs (first day of egg lay) and mortality until all  
215 females had died. Total number of eggs laid per female was recorded at the end of experiment.  
216 Dead mosquitoes were frozen at -20°C and later dissected to determine number of mature  
217 retained eggs, if any. We compared the total eggs produced (retained + laid eggs). In replicate  
218 two, mosquitoes with a large number of retained eggs were not counted and were therefore not  
219 included in the egg analyses but were included in survival analyses. For individuals where egg  
220 retention data was not available, number of eggs laid was used. The following blood types were  
221 tested: replicate one included human, rat, cat, and horse; replicates two and three included  
222 human, rat, cat, horse, and opossum; replicate four included human, rat and opossum.

223 *Between-population differences of Long Island and Baltimore Ae. albopictus*

224 Because of the striking differences in field-collected host blood meal sources between our study  
225 and a prior Baltimore study<sup>6</sup>, we assessed whether fitness varied between *Ae. albopictus* from  
226 these two locations after feeding on rat (source of 72.3% of blood meals in Baltimore, and 1.1%

227 of blood meals in our current study of mosquitoes on Long Island) and human blood (source of  
228 13.6% of blood meals in Baltimore and 32.2% in Long Island)<sup>6</sup>.

229 **Fecundity and survival:** Long Island and Baltimore *Ae. albopictus* were fed rat and human  
230 blood and observed synchronously. The rat and human-fed Long Island individual mosquitoes  
231 from replicates 1-3 of the within-population fitness assessment described above were used to  
232 compare both between-population fitness of Long Island and Baltimore *Ae. albopictus* and  
233 within-population fitness of Long Island *Ae. albopictus*. The wing length of a subset of Long  
234 Island and Baltimore individuals was measured to control for body size differences between the  
235 two colonies<sup>32, 33</sup>.

236

## 237 *Data Analysis*

### 238 *Host availability*

239 **Residential Host Feeding Index:** Abundance and time-weighted host feeding indices (HFI)  
240 were calculated using blood meal identification data from residential areas and household  
241 interview data for humans, cats and dogs. Feeding indices were calculated according to equations  
242 described by Kay et al. (1979) and modified by Richards et al. (2006) as follows<sup>8, 34</sup>:

$$\text{HFI} = \frac{B_x/B_y}{H_x/H_y}$$

243 where  $B_x$  and  $B_y$  represent the average number of blood meals from host  $x$  and host  $y$  per  
244 household and  $H_x$  and  $H_y$  represent the average number of host  $x$  and host  $y$  residing per  
245 household. Averages were calculated with data from households positive for at least one

246 bloodmeal. Data were aggregated across all four residential sites because household and site-  
247 specific calculations frequently resulted in non-real values due to zeroes in the denominators.

248 A time-weighted feeding index<sup>8</sup> was calculated as follows:

$$\text{HFI}_T = \text{HFI} \left( \frac{T_y}{T_x} \right)$$

249 where  $T_y$  and  $T_x$  represent the time spent outside by hosts  $y$  and  $x$ , respectively. When household  
250 interview data was missing on the date of bloodmeal collection (26 of 66 surveys), the average of  
251 all other interview responses from that household was used as an approximation.

252 An HFI or  $\text{HFI}_T$  greater than 1 indicated that host  $x$  was fed upon more often than  
253 expected compared to host  $y$  given their abundance or time spent outside. An HFI or  $\text{HFI}_T$  equal  
254 to 1 indicated that the hosts were fed upon in proportion to their availability and an HFI or  $\text{HFI}_T$   
255 less than 1 indicated that host  $y$  was fed upon more often than expected compared to host  $x$ . Note  
256 that while an HFI or  $\text{HFI}_T$  greater or less than 1 may reflect *Ae. albopictus* preference, it does not  
257 conclusively demonstrate it, as we cannot rule out influences from other factors such as host  
258 defenses, timing of host availability, or host location in the yard.

259

260 **Residential Forage Ratio:** Forage ratios are another method for determining host feeding  
261 frequency by host availability<sup>3</sup>. In our study, these were calculated using blood meal  
262 identification data and camera trap images from residential sites. Forage ratios were calculated  
263 for each animal species that was captured by camera traps as follows<sup>35</sup>:

$$\frac{\text{Number of blood meals from host } x / \text{Total number of all blood meals}}{\text{Number of host } x \text{ in the population} / \text{Total number of all hosts in population}}$$

264 In the case of this study, the proportion of all hosts represented by host  $x$  was approximated by  
265 the proportion of all camera trap images that were taken of host  $x$ . Because camera traps were  
266 only placed in 2 properties per site, forage ratio calculations were limited to animals that tend to  
267 cross freely between yards, including all wild animals and cats, but excluding humans and dogs.

268 A forage ratio greater than one suggests that the host was fed upon more often than  
269 expected given its abundance and less than one suggests that the host was fed upon less often  
270 than expected. A forage ratio equal to one indicates that the host was fed upon in proportion to  
271 its abundance in the population. As with host feeding indices, forage ratios may reflect  
272 preference but do not prove it because the same sources of bias may impact these results.

273

274 **Farm Host Availability:** At the farm sites, host feeding indices and forage ratios were not  
275 calculated due to small sample sizes and technical difficulties of defining host availability.  
276 Interviews of human and domestic animal availability were only conducted once at farms during  
277 the last week of collections. Farm owners could not accurately estimate human exposure due to  
278 unpredictable influx of people on site for riding lessons and farm work. Animal exposure could  
279 not be reliably measured because of inconsistent use of fenced paddocks and semi-enclosed  
280 barns. Camera traps were positioned in order to picture wild animals at the outskirts of the  
281 fenced paddocks and therefore did not often picture domestic farm animals. Interview and  
282 camera trap data is reported for each but are only qualitatively compared to blood meal data; no  
283 further calculations were conducted.

284

285 *Life table studies- fitness by host species*

286 **Within-population differences:** The effect of host blood source on egg production (fecundity)  
287 was assessed with a linear model, including replicate and mosquito survival as covariates. The  
288 effect of host blood source on mosquito survival was also determined using a linear model,  
289 including replicate as a covariate. Estimated marginal means *post hoc* analyses were conducted  
290 using the emmeans package<sup>36</sup>. Survival curves were created with the average proportion  
291 surviving across the replicates and compared for each host blood species. The basic reproductive  
292 rate ( $R_0$ ) was calculated for each blood type and replicate according to previously described  
293 equations<sup>37</sup>. The effect of blood type on  $R_0$  was compared via a linear model.

294 **Between-population differences:** Egg production and survival were compared between  
295 human/rat, Long Island/ Baltimore groups using linear models, as described above. However, in  
296 this case, number of eggs produced by each individual was divided by average wing length of the  
297 cohort, reported as eggs per mm wing length (eggs/mm wl), in order to control for the effect of  
298 body size, which differed between Baltimore and Long Island colonies despite identical rearing.

299

### 300 ***Ethics approval:***

301 Survey protocols were reviewed and considered exempt by Cornell University's Institutional  
302 Review Board (IRB).

303

## 304 **Results**

305 ***Blood Meal Identification:*** 3,241 *Ae. albopictus* were collected over the course of the summer  
306 (1,575 female and 1,666 male) and 182 (14% of aspirator-collected females) were blood-fed. Of  
307 these, 152 blood meals were less than half digested. Host identity was successfully assigned to

308 90 samples (49.5%), including 29 human (*Homo sapiens*; 32.2%), 22 cat (*Felis catus*; 24.4%),  
309 16 horse (*Equus caballus*; 17.8%), 12 opossum (*Didelphis virginiana*; 13.3%), 5 dog (*Canis*  
310 *lupus familiaris*; 5.6%), 2 goat (*Capra hircus*; 2.2%), and 1 each of rabbit (*Sylvilagus floridanus*;  
311 1.1%), rat (*Rattus norvegicus*; 1.1%), squirrel (*Sciurus carolinensis*; 1.1%), and racoon (*Procyon*  
312 *lotor*; 1.1%). When divided into residential (n=66) and farm sites (n=24), most of the residential  
313 blood meals were from humans (40.9%), followed by cat (31.8%) and opossum (18.2%). The  
314 majority of farm blood meals were from horses (66.7%), followed by human (8.3%) and goat  
315 (8.3%) (Figure 1).

316

### 317 *Host availability*

318 **Residential Host Feeding Index:** Household interview and blood meal data were used to  
319 calculate host feeding indices (HFIs), indicative of relative tendency to feed on certain vertebrate  
320 hosts at all residential properties where blood meals were collected (n=28) (Table 2). The most  
321 human blood meals were collected per property ( $0.96 \pm 0.21$ ), followed by cat ( $0.75 \pm 0.17$ ), and  
322 dog ( $0.18 \pm 0.09$ ). Similarly, there were the most human residents per property ( $3.18 \pm 0.36$ ),  
323 followed by cat ( $0.39 \pm 0.19$ ), and dog ( $0.29 \pm 0.10$ ). However, cats spent the most time outside  
324 over the 2 days prior to collection ( $278.74 \pm 232.93$  min), followed by humans ( $234.26 \pm 49.83$   
325 min), and dogs ( $53.61 \pm 22.05$  min). The standard error in cat time was large because some  
326 individuals were outdoor cats (24 hrs/d) while others were only allowed outside for short periods  
327 of time.

328

### 329 **Table 2**

330 Mean ( $\pm$  SE) number of blood meals, residents, and time spent outside for humans, cats and dogs  
331 per property

| Mean ( $\pm$ SE) per property |             |             |                    |
|-------------------------------|-------------|-------------|--------------------|
| Host                          | Blood meal  | Residents   | Time outside (min) |
| Human                         | 0.96 (0.21) | 3.18 (0.36) | 234.26 (49.83)     |
| Cat                           | 0.75 (0.17) | 0.39 (0.19) | 278.74 (232.93)    |
| Dog                           | 0.18 (0.09) | 0.29 (0.10) | 53.61 (22.05)      |

332  
333 Mean numbers of blood meals and residents were used to calculate pairwise comparisons of  
334 feeding between humans, cats, and dogs through abundance and time-weighted HFIs (Table 3).  
335 Human vs cat HFI and HFI<sub>T</sub> both demonstrate a tendency to feed on cats compared to humans  
336 (0.16 and 0.20). Likewise, human vs dog HFI and HFI<sub>T</sub> both suggest that *Ae. albopictus* feeds  
337 disproportionately often on dogs compared to humans (0.49 and 0.14). However, cat vs dog HFI  
338 and HFI<sub>T</sub> produced opposite results: according to abundance measures, cats were fed upon  
339 disproportionately more often compared to dogs (3.05), but when time-weighted, dogs were fed  
340 upon disproportionately more often compared to cats (0.73). On average, cats spent much more  
341 time outside than dogs, causing the directionality change of the index. Furthermore, neither HFI  
342 metric demonstrates a particularly strong deviance from the expected feeding proportions,  
343 suggesting that *Ae. albopictus* may not have a strong preference between cats and dogs.

344

345 **Table 3**



346 Abundance and time-weighted host feeding indices

| Index            | Human vs Cat | Human vs Dog | Cat vs Dog |
|------------------|--------------|--------------|------------|
| HFI              | 0.16         | 0.49         | 3.05       |
| HFI <sub>T</sub> | 0.20         | 0.14         | 0.73       |

347

348 **Residential Forage Ratio:** Forage ratios (FRs) were calculated from camera trap data at the 4  
349 residential sites for all animals for which camera trap images were taken or blood meals  
350 collected (Table 4). Cats and opossums were fed upon more often than expected given their  
351 relative abundance in the host population. Of all residential blood meals taken from free roaming  
352 species (i.e., not humans and dogs),  $65.7 \pm 10.2\%$  were derived from cats, but only  $27.4 \pm 10.9\%$   
353 of all images were taken of cats, resulting in a  $3.56 \pm 0.98$  FR (above the FR=1 threshold to infer  
354 preference). Opossum blood meals accounted for  $31.8 \pm 10.8\%$  of all blood meals but no  
355 opossums were pictured, resulting in an undefined FR, suggesting preference for opossums.  
356 Raccoons, the other nocturnal animal, were pictured often ( $24.8 \pm 16.4\%$  of all images) but only  
357 represented  $2.5 \pm 2.5\%$  of all blood meals, resulting in a FR below 1 ( $0.046 \pm 0.046$ ), suggesting  
358 avoidance. Squirrels and birds were also pictured often ( $21.6 \pm 10.5\%$  and  $26.2 \pm 11.2\%$   
359 respectively) but no blood meals were collected at residential sites, resulting in a FR of 0,  
360 suggesting avoidance.

361

362 **Table 4**

363 Mean ( $\pm$  SE) percentage of all blood meals, percentage of all animals and forage ratio for all  
364 animals for which camera trap images were taken or blood meals collected at residential sites  
365 (n=4) in Suffolk County, NY.

|          | Mean ( $\pm$ SE)     |                 |              |
|----------|----------------------|-----------------|--------------|
|          | % of all blood meals | % of all images | Forage Ratio |
| Cat      | 65.7 (10.2)          | 27.3 (10.9)     | 3.6 (1.0)    |
| Possum   | 31.8 (10.8)          | 0 (0)           | $\infty^*$   |
| Raccoon  | 2.5 (2.5)            | 24.8 (16.4)     | 0.05 (0.05)  |
| Squirrel | 0 (0)                | 21.6 (10.5)     | 0 (0)        |
| Bird     | 0 (0)                | 26.2 (11.2)     | 0 (0)        |

366 \*FR was infinite because division by zero is undefined

367

368 **Farm Host Availability:** Approximate numbers and time spent outside for humans and domestic  
369 animals were reported by the farm owners. At Farm A, approximately nine people spent time at  
370 the farm for a total of 52 hours per day. The farm also had 40 horses, spending a total of 70 hrs/d  
371 outside. At Farm A, 3.6% of camera trap images were of cats, 67.9% of raccoons, 17.9% of  
372 foxes, 3.6% of deer, and 7.1% of squirrels. Blood meals collected at Farm A included 6 horse  
373 and 1 squirrel.

374 Farm B estimated that 30 people (180 hrs), 100 horses (200 hrs), 2 dogs (26 hrs), and 2  
375 goats (26 hrs) were outside on the property per day. Of all camera trap images at Farm B, 37.1%

376 were of cats, 44.3% of raccoons, 4.1% of opossums, 5.2% of deer, 5.2% of squirrels, and 4.1%  
377 of rabbits. The blood meals consisted of 5 horses, 1 human, and 1 rabbit.

378 Farm C estimated that 7 people (11 hrs), 46 horses (420 hrs), 2 dogs (12 hrs), 18 chickens  
379 (171 hrs), 4 ducks (38 hrs), and 1 goose (24 hrs) spent time outside per day. The most images  
380 were taken of cats (48.8%), followed by birds (23.3%), raccoons (14.0%), squirrels (9.3%) and  
381 rabbits (4.7%). Blood meals included 4 horses and 1 cat.

382 Farm D estimated that 3 people (14 hrs), 8 horses (48 hrs), 2 dogs ( 8 hrs), 20 goats (260  
383 hrs), 4 sheep (52 hrs), 1 alpaca (24 hrs), 1 llama (24 hrs), 20 rabbits (260 hrs), 9 ducks (117 hrs),  
384 and 30 chickens (720 hrs) spent time outside per day. The camera trap pictured raccoons (33.3%)  
385 and birds (66.7%). Blood meals collected included: 2 goat, 1 horse, 1 human, and 1 rat.

386 Despite the diversity of hosts available at the 4 farm sites, the predominant blood meal  
387 identified at three of these sites was horse. The fourth farm was an anomaly, with more blood  
388 meals collected from goats than horses, but it was also the only farm where more goats were  
389 available than horses. Once again, raccoons were pictured at all sites, but no blood meals were  
390 collected, further suggesting avoidance of this animal. Birds were pictured frequently at 2 sites,  
391 and no blood meals collected, also suggesting avoidance.

392

### 393 *Fitness by Host Species*

#### 394 *Within-population differences of Long Island Aedes albopictus*

395 The proportions of *Ae. albopictus* that laid and retained mature eggs and mean ( $\pm$  SE)  
396 number of eggs produced are reported in Table 5.

397 **Table 5:** Egg production by blood meal source for Long Island *Ae. albopictus*

| <b>Blood Source</b> | <b>Proportion which laid eggs (%)</b> | <b>Proportion with retained eggs (%)*</b> | <b>Mean eggs produced (<math>\pm</math> SE)</b> |
|---------------------|---------------------------------------|-------------------------------------------|-------------------------------------------------|
| Cat                 | 57/89 (64.0)                          | 10/89 (11.2)                              | 40.3 (4.0)                                      |
| Horse               | 70/97 (72.2)                          | 11/97 (11.3)                              | 48.5 (3.9)                                      |
| Human               | 104/121 (86.0)                        | 23/121 (19.0)                             | 61.0 (2.9)                                      |
| Rat                 | 100/122 (82.0)                        | 16/122 (13.1)                             | 53.5 (3.7)                                      |
| Opossum             | 64/86 (74.4)                          | 10/86 (11.6)                              | 58.7 (4.8)                                      |

398 \*Includes mosquitoes with any number of retained eggs

399 Females that ingested cat blood resulted in lower fecundity compared to those fed human and  
400 opossum blood ( $\beta = -17.3$ ,  $SE = 5.3$ ,  $P = 0.01$  and  $\beta = -20.9$ ,  $SE = 5.9$ ,  $P = 0.004$ , respectively). There  
401 was no significant difference between any other blood group (Figure 2a). There was also no  
402 significant effect of survival time on number of eggs produced (although only one blood meal  
403 was provided in this study, which may limit impact of extended survival). On average, all blood  
404 groups began laying on day 3 post-blood meal, and all blood groups survived for 7-9 days.  
405 Notably, there were significant differences between replicates; mosquitoes in replicate 1  
406 produced more eggs than replicate 2 and 3 ( $\beta = 30.67$ ,  $SE = 447$ ,  $P < 0.0001$  and  $\beta = 35.69$ ,  
407  $SE = 4.41$ ,  $P < 0.0001$ , respectively) and mosquitoes in replicates 2 and 3 produced fewer eggs than  
408 replicate 4 ( $\beta = -30.37$ ,  $SE = 5.37$ ,  $P < 0.0001$  and  $\beta = -35.39$ ,  $SE = 5.38$ ,  $P < 0.0001$ , respectively).

409 There were no significant differences in survival time between any of the host blood  
410 groups (Figure 2b). Mosquitoes fed cat blood survived ( $\pm$  SE) 7.6 ( $\pm 0.45$ ) days, horse-fed  
411 survived 8.6 ( $\pm 0.48$ ) days, human-fed survived 9.6 ( $\pm 0.3$ ) days, rat-fed survived 8.7 ( $\pm 0.4$ ) days,  
412 and opossum-fed survived 9.5 ( $\pm 0.6$ ) days. There were significant differences in survival by  
413 replicate: replicate 1 had higher survival than replicate 3 ( $\beta = 1.7$ ,  $SE = 0.5$ ,  $P = 0.006$ ) and  
414 replicates 1, 2, and 3 had lower survival than replicate 4 ( $\beta = -3.5$ ,  $SE = 0.6$ ,  $P < 0.0001$ ;  $\beta = -4.5$ ,  
415  $SE = 0.6$ ,  $P < 0.0001$ ;  $\beta = -5.1$ ,  $SE = 0.6$ ,  $P < 0.0001$  respectively). Daily survival curves averaged  
416 over the three or four replicates are presented in Figure 3.

417 The mean ( $\pm$ SE)  $R_0$  across replicates was 19.5 ( $\pm$ 6.5) for Long Island *Ae. albopictus* fed  
418 cat blood, 22.9 ( $\pm$ 5.7) for horse blood, 29.7 ( $\pm$ 4.1) for human, 27.1 ( $\pm$ 8.9) for opossum, and 27.0  
419 ( $\pm$ 4.1) for rat. No significant differences in ( $R_0$ ) were found by host blood group.

#### 420 ***Between-population differences of Long Island and Baltimore Ae. albopictus***

421 The proportions of *Ae. albopictus* that laid and retained mature eggs, mean ( $\pm$  SE) eggs,  
422 and mean ( $\pm$  SE) eggs/mm wl is reported in Table 6.

423 **Table 6:** Egg production for Long Island and Baltimore *Aedes albopictus* females fed human or  
424 rat blood

| Origin and Blood Source | Proportion which laid eggs (%) | Proportion with retained eggs (%) | Mean eggs produced ( $\pm$ SE) | Mean eggs/mm w produced ( $\pm$ SE) |
|-------------------------|--------------------------------|-----------------------------------|--------------------------------|-------------------------------------|
| Baltimore Human         | 73/89 (82.0)                   | 12/89 (13.5)                      | 41.4 (3.2)                     | 14.7 (1.1)                          |
| Baltimore Rat           | 70/95 (73.7)                   | 11/95 (11.6)                      | 38.2 (3.5)                     | 13.6 (1.3)                          |
| Long Island Human       | 76/89 (85.4)                   | 17/89 (19.1)                      | 58.8 (3.6)                     | 20.7 (1.3)                          |
| Long Island Rat         | 75/95 (78.9)                   | 13/95 (13.7)                      | 46.1 (4.0)                     | 16.2 (1.4)                          |

425  
426 The only significant differences in eggs produced per mm wing length were between  
427 Long Island mosquitoes fed human blood and the three other groups (Figure 4a). Baltimore  
428 mosquitoes fed human ( $\beta$ = -6.0, SE=1.8,  $P$ =0.0008) and rat blood ( $\beta$ = -6.9, SE=1.8,  $P$ =0.0001)  
429 produced fewer eggs/mm wl than Long Island mosquitoes fed human blood. Long Island  
430 mosquitoes fed human blood produced more eggs per mm wl than those fed rat blood ( $\beta$ = 3.8,  
431 SE=1.8,  $P$ =0.03). Baltimore mosquitoes fed rat blood produced marginally fewer eggs/mm wl  
432 than Long Island mosquitoes fed rat blood ( $\beta$ = -3.1, SE=1.7,  $P$ =0.07). There was no significant  
433 difference in eggs produced/mm wl between Baltimore mosquitoes fed human and rat blood ( $\beta$ =  
434 1.0, SE=1.8,  $P$ =0.6) or Baltimore mosquitoes fed human blood and Long Island mosquitoes fed  
435 rat blood ( $\beta$ = -2.1, SE=1.8,  $P$ =0.2).

436 The mean ( $\pm$  SE) survival time of Baltimore *Ae. albopictus* was significantly higher for  
437 human blood (9.6 days  $\pm$ 0.4) compared to rat blood (7.2 days  $\pm$ 0.4) ( $\beta$ = 2.3, SE=0.5,  $P$ =0.0001).  
438 The same survival trend was observed for Long Island *Ae. albopictus* where mosquitoes fed  
439 human blood survived marginally longer than those fed rat blood (9.0 days  $\pm$ 0.3 and 7.7 days  
440  $\pm$ 0.4 respectively:  $\beta$ = 1.3, SE=0.5,  $P$ =0.08) (Figure 4b). Baltimore mosquitoes fed human blood  
441 survived significantly longer compared to Long Island mosquitoes fed rat blood ( $\beta$ =1.9, SE=0.5,  
442  $P$ =0.002). Survival time was significantly lower for Baltimore mosquitoes fed rat blood  
443 compared to Long Island mosquitoes fed human blood ( $\beta$ =-1.7, SE=0.5,  $P$ =0.008). There was no  
444 significant difference in survival time between mosquitoes fed human blood from both sites ( $\beta$ =  
445 0.6, SE=0.5,  $P$ =0.6) or fed rat blood from both sites ( $\beta$ = -0.4, SE=0.5,  $P$ =0.8). We did detect  
446 differences by replicate, where replicate 1 had a higher survival than replicate 2 ( $\beta$ = 1.4, SE=0.5,  
447  $P$ =0.006) while paired replicates 1-3 and 2-3 had no significant difference in survival ( $\beta$ = 0.9,  
448 SE=0.4,  $P$ =0.1 and  $\beta$ = -0.6, SE=0.5,  $P$ =0.4 respectively). Daily survival curves averaged over  
449 the three replicates are presented in Figure 5.

450 The mean ( $\pm$ SE) basic reproductive rate ( $R_0$ ) (averaged over 3 replicates) of Baltimore  
451 *Ae. albopictus* fed human blood is 20.4 ( $\pm$ 1.2), 19.7 ( $\pm$  4.6) for Baltimore rat, 29.3 ( $\pm$  5.7) for  
452 Long Island, and 24.5 ( $\pm$  4.5) for Long Island rat. No significant differences occurred between  $R_0$   
453 of any of the blood groups.

454

## 455 **Discussion**

456 Mosquito feeding behavior plays a vital role in disease transmission, however, it can be difficult  
457 to understand and predict because there are diverse factors that influence feeding behavior in

458 nature. We investigated the feeding patterns of the globally invasive vector, *Ae. albopictus*, in  
459 farm and residential habitats at the northern edge of its range in the United States. In tandem, we  
460 addressed two factors that may influence these patterns: host availability and variation in  
461 mosquito fitness from different host blood sources.

462         The ten host species we detected in *Ae. albopictus* blood meals from Long Island, NY are  
463 hosts previously reported for this species elsewhere in the world. The proportion of human blood  
464 meals (32.2%) identified in Long Island was lower than reported in many other locations  
465 worldwide<sup>3, 4, 10, 11, 13, 14, 15, 16, 17, 18, 38</sup>, but was higher than in other studies from the United States  
466 (Hawaii, Missouri, North Carolina, and Maryland)<sup>5, 6, 7, 8</sup>. More *Ae. albopictus* fed on cats in our  
467 study on Long Island than in any other location previously reported. The third most common  
468 host for this mosquito species on Long Island, the horse, has only been detected in four of  
469 sixteen previous *Ae. albopictus* blood meal studies and at lower levels<sup>7, 8, 13, 14</sup>. Similarly, the  
470 fourth most common host, opossum, has been reported in four previous studies, also at lower  
471 levels<sup>5, 8, 10, 15</sup>. Long Island *Aedes albopictus* fed less frequently on dogs compared to the  
472 representative proportion in numerous other studies<sup>7</sup>. Notably absent from the Long Island blood  
473 meals were cows, deer, and birds, all of which were present on at least one site in our study and  
474 have been detected in at least six previous blood meal studies. It is possible that a larger  
475 sampling of blood meals may have revealed these hosts, however, birds have also been absent  
476 from other studies in Northeastern USA<sup>6, 10, 15</sup>. Notably, only about half of collected blood meals  
477 were successfully identified to species, but the reason for the low success rate is unknown. It is  
478 possible that this may have biased the species that were identified, however, tests of primer  
479 versatility performed by Reeves et al. (2018) showed amplification for the majority of vertebrate  
480 species (90/93)<sup>29</sup>.

481           This is only the third study of *Ae. albopictus* blood feeding biology that quantitatively  
482 assessed host availability, and the first to do so with wild animals. Abundance and time-weighted  
483 host feeding indices (HFIs) calculated using household interview data revealed  
484 disproportionately high levels of feeding on cats and dogs compared to humans. Richards et al.  
485 (2006) reported a similar trend for HFIs based on host abundance in North Carolina, but when  
486 time-weighted, found that humans were fed upon disproportionately often compared to cats and  
487 dogs<sup>8</sup>. In Brazil, HFIs based on host abundance showed the opposite trend to ours, suggesting  
488 that *Ae. albopictus* fed disproportionately often on humans compared to cats and dogs<sup>13</sup>. These  
489 results highlight the need for additional studies that measure host availability and also suggest a  
490 need for caution when extrapolating these results to make conclusions about innate mosquito  
491 preference. In both Long Island and North Carolina, collections were only conducted at a subset  
492 of houses per neighborhood, allowing for the movement of blood fed mosquitoes from properties  
493 where interviews were not conducted. Flight range for engorged blood fed *Ae. albopictus* is not  
494 known, but reported range of other blood fed species suggest that movement between properties  
495 is possible after feeding, as do records of *Ae. albopictus* dispersal between blood feeding and  
496 oviposition<sup>39, 40, 41, 42</sup>. Furthermore, household interview data depends on accurate self-reporting  
497 of outdoor activity, which may be unreliable<sup>43</sup>. This inaccuracy of outdoor time estimates is  
498 compounded if the interview is only administered once for the entire sampling period, such as in  
499 Richards et al. (2006)<sup>8</sup>.

500           We also assessed host availability through camera traps in order to calculate forage ratios  
501 for free-roaming animals, which suggest a tendency to feed on cats and opossums and to avoid  
502 raccoons, squirrels, and birds compared to their relative abundance in residential sites. While  
503 camera traps do not provide a perfect measure of host abundance, it is considered a robust



504 method for mammal inventories<sup>44</sup>. Camera traps may be less useful in estimating bird  
505 abundance<sup>45</sup>, however, birds were one of the most frequently photographed groups of animals in  
506 our study, but were not fed upon, so improved accuracy in estimating bird abundance would not  
507 have altered conclusions drawn from forage ratio calculations.

508         Despite limitations, estimating host availability and abundance in conjunction with blood  
509 meal studies is much more informative than studies that lack such data. By understanding more  
510 about the context in which a certain feeding pattern arose, more general conclusions can be  
511 drawn about feeding behavior. The patterns revealed after accounting for host availability can be  
512 caused by numerous factors, such as host defenses. This may explain the high number of  
513 opossum blood meals because this nocturnal marsupial would likely be asleep, with decreased  
514 self-defense, during *Ae. albopictus* daytime biting activity. However, raccoons are also nocturnal  
515 and in contrast, were fed upon less often than expected, suggesting that innate preferences or  
516 other factors could potentially also be at play. Only two preference studies have been conducted  
517 for *Ae. albopictus*; in La Reunion Island, a no-choice blood feeding experiment on 12 animal  
518 species found chicken, human, dog and cow were fed upon more often than duck, shrew, rat, pig,  
519 mouse, goat, gecko, and chameleon<sup>20</sup>. Subsequently, a choice experiment showed higher  
520 attraction to humans compared to chicken, dog, cow and goat<sup>20</sup>. However, large and small  
521 animals were treated differently and were not given equal opportunities for self-defense,  
522 potentially affecting results. In Thailand, landing catches demonstrated preference for humans  
523 compared to pigs, buffalo, dogs, and chickens; however, the use of a second human to catch  
524 mosquitoes from the non-human animals may have impacted results. It therefore remains  
525 unclear whether *Ae. albopictus* has innate host preference.

526           One mechanism by which host preferences may evolve is through natural selection  
527 whereby feeding on a certain host enhances reproductive fitness, leading selection to favor  
528 genetic variants with preference for that host<sup>46</sup>. This is known to be the case for other species,  
529 such as *Ae. aegypti*<sup>23</sup>. We investigated the potential role of fitness in driving *Ae. albopictus*  
530 feeding patterns by assessing survival and egg production of mosquitoes fed on several host  
531 species in the Northeastern United States. Within the Long Island *Ae. albopictus* population, we  
532 found that host species had very limited impact on survival, egg production, or basic  
533 reproductive rate. The only significant differences were lower egg production after feeding on  
534 cats compared to humans and opossums, and no significant differences in survival. Interestingly,  
535 the reduced fecundity on cat blood is opposite to what we might expect based on the feeding  
536 index, which suggested a tendency to feed more often on cats compared to humans. A previous  
537 report from Baltimore of high feeding rates on rats, led us to compare the fitness of Long Island  
538 and Baltimore *Ae. albopictus* after feeding on human and rat blood. Specifically, we investigated  
539 whether differences in fitness may be driving the striking differences in feeding patterns between  
540 the two locations. However, the only significant difference was higher egg production by Long  
541 Island mosquitoes fed human blood than all three other groups. If egg production was driving  
542 this difference, we would expect to also see higher egg production for Baltimore mosquitoes fed  
543 rat compared to human blood, but this was not the case. Furthermore, survival of mosquitoes fed  
544 on human blood was longer than those fed on rat blood for both Baltimore and Long Island *Ae.*  
545 *albopictus*. Together, these results suggest that fitness advantage does not drive different feeding  
546 patterns in these two locations.

547           The impact of host species on *Ae. albopictus* egg production has only been assessed twice  
548 before. Gubler (1970) found greater fecundity for mouse-fed females, followed by guinea pig,

549 rat, and chicken; however, the study was not replicated and no statistical analyses were  
550 conducted<sup>25</sup>. In another study, chicken-fed *Ae. albopictus* were less fecund than those offered  
551 guinea pig or human blood and, consistent with our results, no differences between the two  
552 mammal species were found<sup>24</sup>. These results do not demonstrate a selective pressure for *Ae.*  
553 *albopictus* to evolve preferences within mammalian hosts. However, preference can evolve  
554 through other pathways and should be assessed directly. Other specialist feeders lack apparent  
555 fitness advantages for their preferred host. For example, *Anopheles gambiae* has a well-  
556 established preference for humans, but in a single study conducted to date, there is no fitness  
557 advantage provided by a human-only diet compared to a generalist diet<sup>47</sup>.

558         It is also possible that when assessed under different conditions, differences in fitness by  
559 host species may be revealed. For instance, we did not provide the mosquitoes with sugar after  
560 blood feeding; the presence of sugar has been shown to reduce reproductive fitness in *Ae.*  
561 *albopictus* compared to human blood alone and mosquitoes on Long Island feed frequently on  
562 sugar<sup>33,48</sup>. For *Ae. aegypti*, the addition of sugar<sup>33,48</sup> changed the directionality of host species effects  
563 on fitness, shifting the fitness benefits from human to mouse blood<sup>23</sup>. If a similar phenomenon  
564 exists for *Ae. albopictus*, the absence of sugar in our experiments would maximize the fitness of  
565 human blood compared to other species. We also only provided the mosquitoes with one blood  
566 meal. Providing a more natural series of blood meals may have influenced our results.

567         *Aedes albopictus* is often referred to as anthropophilic due to the high percentage of  
568 human blood meals in numerous field studies and the preference assessments conducted by  
569 Delatte et al. (2010)<sup>20</sup>. However, this classification remains unproven. In fact, our results are  
570 more indicative of a generally mammalophilic feeding behavior for *Ae. albopictus*. It is  
571 important to understand the underlying blood feeding behavior and physiology of *Ae. albopictus*

572 because it influences and modulates the feeding patterns in the field, which will ultimately  
573 influence pathogen transmission<sup>19</sup>. In Long Island, the diverse utilization of hosts in residential  
574 and farm settings demonstrates that *Ae. albopictus* could serve as an enzootic bridge vector.  
575 However, the absence of bird blood meals suggests that *Ae. albopictus* may be of limited concern  
576 as a vector of West Nile and Eastern equine encephalitis viruses in the Northeastern US.  
577 Populations of *Ae. albopictus* in this region have sufficient vector competence to transmit  
578 numerous anthroponotic viruses<sup>49, 50, 51</sup>, but transmission of these pathogens may be limited due  
579 to lower rates of human feeding compared to other regions<sup>52</sup>.

580 Our results provide insight into disease transmission risk by *Ae. albopictus* in  
581 Northeastern United States. Additionally, our observations reveal that host availability has a  
582 major impact on feeding patterns, but did not fully explain blood meal distribution. Fitness  
583 benefits did not explain the feeding patterns observed in Long Island or Baltimore, highlighting  
584 the need for further research on determinants of *Ae. albopictus* feeding behavior.

585 **Acknowledgements.** We thank Dr. Paul Leisnham at the University of Maryland and Dr.  
586 Shannon LaDeau at the Cary Institute for providing the Baltimore *Ae. albopictus* eggs, Dr. Alex  
587 Amaro for assistance with blood meal identification, Dr. Dan Gilrein at Cornell Cooperative  
588 Extension, Moses Cucura, and Dr. Scott Campbell at Suffolk County Government for providing  
589 laboratory space and logistical support, Dr. Erika Mudrak for providing statistical expertise, and  
590 Dr. Talya Shragai for assistance with field site selection. This material is based upon work that is  
591 supported by the National Institute of Food and Agriculture, U.S. Department of Agriculture,  
592 multistate Hatch project under 1014052. This work was also supported in part by Cooperative  
593 Agreement Number U01CK000509, funded by the Centers for Disease Control and Prevention.  
594 Its contents are solely the responsibility of the authors and do not necessarily represent the  
595 official views of the Centers for Disease Control and Prevention or the Department of Health and  
596 Human Services.

597

## 598 **Figure Legends:**

599 **Figure 1. Distribution of blood meals by site type**

600 At residential sites, most *Ae. albopictus* fed on human, followed by cat and opossum. At farm  
601 sites, the majority fed on horse, followed by human and goat.

602

603 **Figure 2 a)** Box plot of number of eggs produced by Long Island mosquitoes fed cat, horse,  
604 human, rat, and opossum blood. Blood types that do not share a letter above boxes are  
605 significantly different. **b)** Box plot of survival time in days. Blood types that do not share a letter  
606 inside boxes are significantly different.

607

608 **Figure 3:** Survival of Long Island *Ae. albopictus* by host blood ingested

609

610 **Figure 4 a)** Box plot of number of eggs produced by Baltimore and Long Island mosquitoes fed  
611 rat and human blood. Groups that do not share a common letter are significantly different. **b)**  
612 Box plot of survival in days. Groups that do not share a common letter are significantly different.

613

614 **Figure 5:** Survival of Baltimore and Long Island *Ae. albopictus* fed human and rat blood. Curves  
615 are averaged over three replicates.

616

## 617 **References Cited**

618

- 619 1. Gratz N, 2004. Critical review of the vector status of *Aedes albopictus*. *Med vet entomol*  
620 18: 215-227.
- 621 2. Kraemer MU, Sinka ME, Duda KA, Mylne AQ, Shearer FM, Barker CM, Moore CG,  
622 Carvalho RG, Coelho GE, Van Bortel WJe, 2015. The global distribution of the arbovirus  
623 vectors *Aedes aegypti* and *Ae. albopictus*. *eLife* 4: e08347.

- 624 3. Ponlawat A, Harrington LC, 2005. Blood feeding patterns of *Aedes aegypti* and *Aedes*  
625 *albopictus* in Thailand. J Med Entomol 42: 844-849.
- 626 4. Kamgang B, Nchoutpouen E, Simard F, Paupy C, 2012. Notes on the blood-feeding  
627 behavior of *Aedes albopictus* (Diptera: Culicidae) in Cameroon. Parasite Vector 5: 4.
- 628 5. Savage HM, Niebylski ML, Smith GC, Mitchell CJ, Craig GB, 1993. Host-feeding  
629 patterns of *Aedes albopictus* (Diptera, Culicidae) at a temperate North American site.  
630 Journal of Medical Entomology 30: 27-34.
- 631 6. Goodman H, Egizi A, Fonseca DM, Leisnham PT, LaDeau SL, 2018. Primary blood-  
632 hosts of mosquitoes are influenced by social and ecological conditions in a complex  
633 urban landscape. Parasite Vector 11: 218.
- 634 7. Tempelis CH, Hayes RO, Hess AD, Reeves WC, 1970. Blood-feeding habits of 4 species  
635 of mosquito found in Hawaii. Am J Trop Med Hyg 19: 335-&.
- 636 8. Richards SL, Ponnusamy L, Unnasch TR, Hassan HK, Apperson CS, 2006. Host-feeding  
637 patterns of *Aedes albopictus* (Diptera : Culicidae) in relation to availability of human and  
638 domestic animals in suburban landscapes of central North Carolina. Journal of Medical  
639 Entomology 43: 543-551.
- 640 9. Gomes AC, Silva NN, Marques G, Brito M, 2003. Host-feeding patterns of potential  
641 human disease vectors in the Paraiba Valley Region, State of Sao Paulo, Brazil. J Vector  
642 Ecol 28: 74-78.
- 643 10. Faraji A, Egizi A, Fonseca DM, Unlu I, Crepeau T, Healy SP, Gaugler R, 2014.  
644 Comparative Host Feeding Patterns of the Asian Tiger Mosquito, *Aedes albopictus*, in  
645 Urban and Suburban Northeastern USA and Implications for Disease Transmission. Plos  
646 Neglect Trop D 8: 11.
- 647 11. Sawabe K, Isawa H, Hoshin K, Sasaki T, Roychoudhury S, Higa Y, Kasai S, Tsuda Y,  
648 Nishiumi I, Hisai N, Hamao S, Kobayashi M, 2010. Host-Feeding Habits of *Culex*  
649 *pipiens* and *Aedes albopictus* (Diptera: Culicidae) Collected at the Urban and Suburban  
650 Residential Areas of Japan. J Med Entomol 47: 442-450.
- 651 12. Niebylski ML, Savage HM, Nasci RS, Craig GB, 1994. Blood hosts of *Aedes albopictus*  
652 in the United States. Journal of the American Mosquito Control Association 10: 447-450.
- 653 13. Gomes AC, Silva NN, Marques G, Brito M, 2003. Host-feeding patterns of potential  
654 human disease vectors in the Paraiba Valley Region, State of Sao Paulo, Brazil. Journal  
655 of Vector Ecology 28: 74-78.
- 656 14. Valerio L, Marini F, Bongiorno G, Facchinelli L, Pombi M, Caputo B, Maroli M, della  
657 Torre A, 2010. Host-Feeding Patterns of *Aedes albopictus* (Diptera: Culicidae) in Urban  
658 and Rural Contexts within Rome Province, Italy. Vector-Borne Zoonot 10: 291-294.
- 659 15. Egizi A, Healy SP, Fonseca DM, 2013. Rapid blood meal scoring in anthropophilic  
660 *Aedes albopictus* and application of PCR blocking to avoid pseudogenes. Infect Genet  
661 Evol 16: 122-128.
- 662 16. Guo XX, Li CX, Wang G, Zheng Z, Dong YD, Zhang YM, Xing D, Zhao TY, 2014.  
663 Host feeding patterns of mosquitoes in a rural malaria-endemic region in Hainan Island,  
664 China. J Am Mosquito Contr 30: 309-311.
- 665 17. Sivan A, Shriram AN, Sunish IP, Vidhya PT, 2015. Host-feeding pattern of *Aedes*  
666 *aegypti* and *Aedes albopictus* (Diptera: Culicidae) in heterogeneous landscapes of South  
667 Andaman, Andaman and Nicobar Islands, India. Parasitology Research 114: 3539-3546.
- 668 18. Kim H, Yu HM, Lim HW, Yang SC, Roh JY, Chang KS, Shin EH, Ju YR, Lee WG,  
669 2017. Host-feeding pattern and dengue virus detection of *Aedes albopictus* (Diptera:

- 670 Culicidae) captured in an urban park in Korea. Journal of Asia-Pacific Entomology 20:  
671 809-813.
- 672 19. Takken W, Verhulst NO, 2013. Host preferences of blood-feeding mosquitoes. Annu rev  
673 entomol 58: 433-453.
- 674 20. Delatte H, Desvars A, Bouétard A, Bord S, Gimonneau G, Vourc'h G, Fontenille D,  
675 2010. Blood-feeding behavior of *Aedes albopictus*, a vector of Chikungunya on La  
676 Réunion. Vector-Borne Zoonot 10: 249-258.
- 677 21. Sullivan MF, Gould DJ, Maneechai S, 1971. Observations on host range and feeding  
678 preferences of *Aedes albopictus* (Skuse). J Med Entomol 8: 713-+.
- 679 22. McBride CS, Baier F, Omondi AB, Spitzer SA, Lutomiah J, Sang R, Ignell R, Vosshall  
680 LBJN, 2014. Evolution of mosquito preference for humans linked to an odorant receptor.  
681 515: 222.
- 682 23. Harrington LC, Edman JD, Scott TW, 2001. Why do female *Aedes aegypti* (Diptera:  
683 Culicidae) feed preferentially and frequently on human blood? J Med Entomol 38: 411-  
684 422.
- 685 24. Xue RD, Barnard DR, Ali A, 2009. Influence of multiple blood meals on gonotrophic  
686 dissociation and fecundity in *Aedes albopictus*. J Am Mosquito Contr 25: 504-507.
- 687 25. Gubler D, 1970. Comparison of reproductive potentials of *Aedes (Stegomyia) albopictus*  
688 Skuse and *Aedes (Stegomyia) polynesiensis* Marks. Mosq News 30: 201-9.
- 689 26. Harrington LC, Shragai T, 2016. New York State Tiger Mosquito Education Network  
690 (Tiger NET).
- 691 27. Shragai T, Harrington LC, 2018. *Aedes albopictus* (Diptera: Culicidae) on an Invasive  
692 Edge: Abundance, Spatial Distribution, and Habitat Usage of Larvae and Pupae Across  
693 Urban and Socioeconomic Environmental Gradients. J Med Entomol.
- 694 28. Andreadis TG, Thomas MC, Shepard JJ, 2005. Identification guide to the mosquitoes of  
695 Connecticut: Connecticut Agricultural Experiment Station.
- 696 29. Reeves LE, Gillett-Kaufman JL, Kawahara AY, Kaufman PE, 2018. Barcoding blood  
697 meals: New vertebrate-specific primer sets for assigning taxonomic identities to host  
698 DNA from mosquito blood meals. PLoS Neglect Trop D 12: e0006767.
- 699 30. Linske MA, Williams SC, Stafford III KC, Ortega IM, 2018. *Ixodes scapularis* (Acari:  
700 Ixodidae) Reservoir Host Diversity and Abundance Impacts on Dilution of *Borrelia*  
701 *burgdorferi* (Spirochaetales: Spirochaetaceae) in Residential and Woodland Habitats in  
702 Connecticut, United States. J Med Entomol 55: 681-690.
- 703 31. Ledesma N, Harrington L, 2015. Fine-scale temperature fluctuation and modulation of  
704 *Dirofilaria immitis* larval development in *Aedes aegypti*. Veterinary parasitology 209: 93-  
705 100.
- 706 32. Nasci RS, 1990. Relationship of wing length to adult dry weight in several mosquito  
707 species (Diptera: Culicidae). J Med Entomol 27: 716-719.
- 708 33. Fikrig K, Peck S, Deckerman P, Dang SR, St Fleur K, Goldsmith H, Qu S, Rosenthal H,  
709 Harrington LC, 2020. Sugar feeding patterns of New York *Aedes albopictus* mosquitoes  
710 are affected by saturation deficit, flowers, and host seeking. Plos Neglect Trop D 14: 16.
- 711 34. Kay BH, Boreham PFL, Edman JD, 1979. Application of the feeding index concept to  
712 studies of mosquito host-feeding patterns. Mosquito News 39: 68-72.
- 713 35. Hess A, Hayes RO, Tempelis C, 1968. The use of the forage ratio technique in mosquito  
714 host preference studies. Mosq News 28: 386-9.



- 715 36. Lenth R, 2019. emmeans: estimated marginal means, aka least-squares means. R package  
716 v. 1.3. 4.
- 717 37. Southwood T, 1978. Introduction to the study of animal populations. Ecological  
718 Methods: Springer, 1-6.
- 719 38. Kek R, Hapuarachchi HC, Chung CY, Bin Humaidi M, Razak M, Chiang S, Lee C, Tan  
720 CH, Yap G, Chong CS, Lee KS, Ng LC, 2014. Feeding Host Range of *Aedes albopictus*  
721 (Diptera: Culicidae) Demonstrates Its Opportunistic Host-Seeking Behavior in Rural  
722 Singapore. *Journal of Medical Entomology* 51: 880-884.
- 723 39. Tuten HC, Bridges WC, Paul KS, Adler PH, 2012. Blood-feeding ecology of mosquitoes  
724 in zoos. *Med Vet Entomol* 26: 407-416.
- 725 40. Greenberg JA, DiMenna MA, Hanelt B, Hofkin BV, 2012. Analysis of post-blood meal  
726 flight distances in mosquitoes utilizing zoo animal blood meals. *J Vector Ecol* 37: 83-89.
- 727 41. Marini F, Caputo B, Pombi M, Tarsitani G, Della Torre A, 2010. Study of *Aedes*  
728 *albopictus* dispersal in Rome, Italy, using sticky traps in mark-release-recapture  
729 experiments. *Med Vet Entomol* 24: 361-368.
- 730 42. Honório NA, Silva WdC, Leite PJ, Gonçalves JM, Lounibos LP, Lourenço-de-Oliveira  
731 R, 2003. Dispersal of *Aedes aegypti* and *Aedes albopictus* (Diptera: Culicidae) in an  
732 urban endemic dengue area in the State of Rio de Janeiro, Brazil. *Mem Inst Oswaldo*  
733 *Cruz* 98: 191-198.
- 734 43. Alshurafa N, Jain J, Stump TK, Spring B, Robinson JK, 2019. Assessing recall of  
735 personal sun exposure by integrating UV dosimeter and self-reported data with a network  
736 flow framework. *Plos one* 14: e0225371.
- 737 44. Silveira L, Jacomo AT, Diniz-Filho JAF, 2003. Camera trap, line transect census and  
738 track surveys: a comparative evaluation. *Biol conserv* 114: 351-355.
- 739 45. O'Brien TG, Kinnaird MF, 2008. A picture is worth a thousand words: the application of  
740 camera trapping to the study of birds. *Bird Conservation International* 18: S144-S162.
- 741 46. Lyimo IN, Ferguson HM, 2009. Ecological and evolutionary determinants of host species  
742 choice in mosquito vectors. *Trends in Parasitology* 25: 189-196.
- 743 47. Lyimo I, Keegan S, Ranford Cartwright L, Ferguson H, 2012. The impact of uniform  
744 and mixed species blood meals on the fitness of the mosquito vector *Anopheles gambiae*  
745 ss: does a specialist pay for diversifying its host species diet? *Journal of Evolutionary*  
746 *Biology* 25: 452-460.
- 747 48. Braks MAH, Juliano SA, Lounibos LP, 2006. Superior reproductive success on human  
748 blood without sugar is not limited to highly anthropophilic mosquito species. *Med Vet*  
749 *Entomol* 20: 53-59.
- 750 49. Sanchez-Vargas I, Harrington LC, Black WC, Olson KE, 2019. Analysis of salivary  
751 glands and saliva from *Aedes albopictus* and *Aedes aegypti* infected with chikungunya  
752 viruses. *Insects* 10: 39.
- 753 50. Dieme C, Ciota AT, Kramer LD, 2020. Transmission potential of Mayaro virus by *Aedes*  
754 *albopictus*, and *Anopheles quadrimaculatus* from United States. *Parasite Vector* 13: 1-6.
- 755 51. Kaczmarek ME, Herzog NL, Noval MG, Zuzworsky J, Shah Z, Bajwa WI, Stapleford  
756 KA, 2020. Distinct New York City *Aedes albopictus* Mosquito Populations Display  
757 Differences in Salivary Gland Protein D7 Diversity and Chikungunya Virus Replication.  
758 *Viruses* 12: 698.
- 759 52. Olson MF, Ndeffo-Mbah ML, Juarez JG, Garcia-Luna S, Martin E, Borucki MK, Frank  
760 M, Estrada-Franco JG, Rodríguez-Pérez MA, Fernández-Santos NA, 2020. High rate of



761 non-human feeding by *Aedes aegypti* reduces Zika virus transmission in South Texas.  
762 Viruses 12: 453.

763

764

765

766

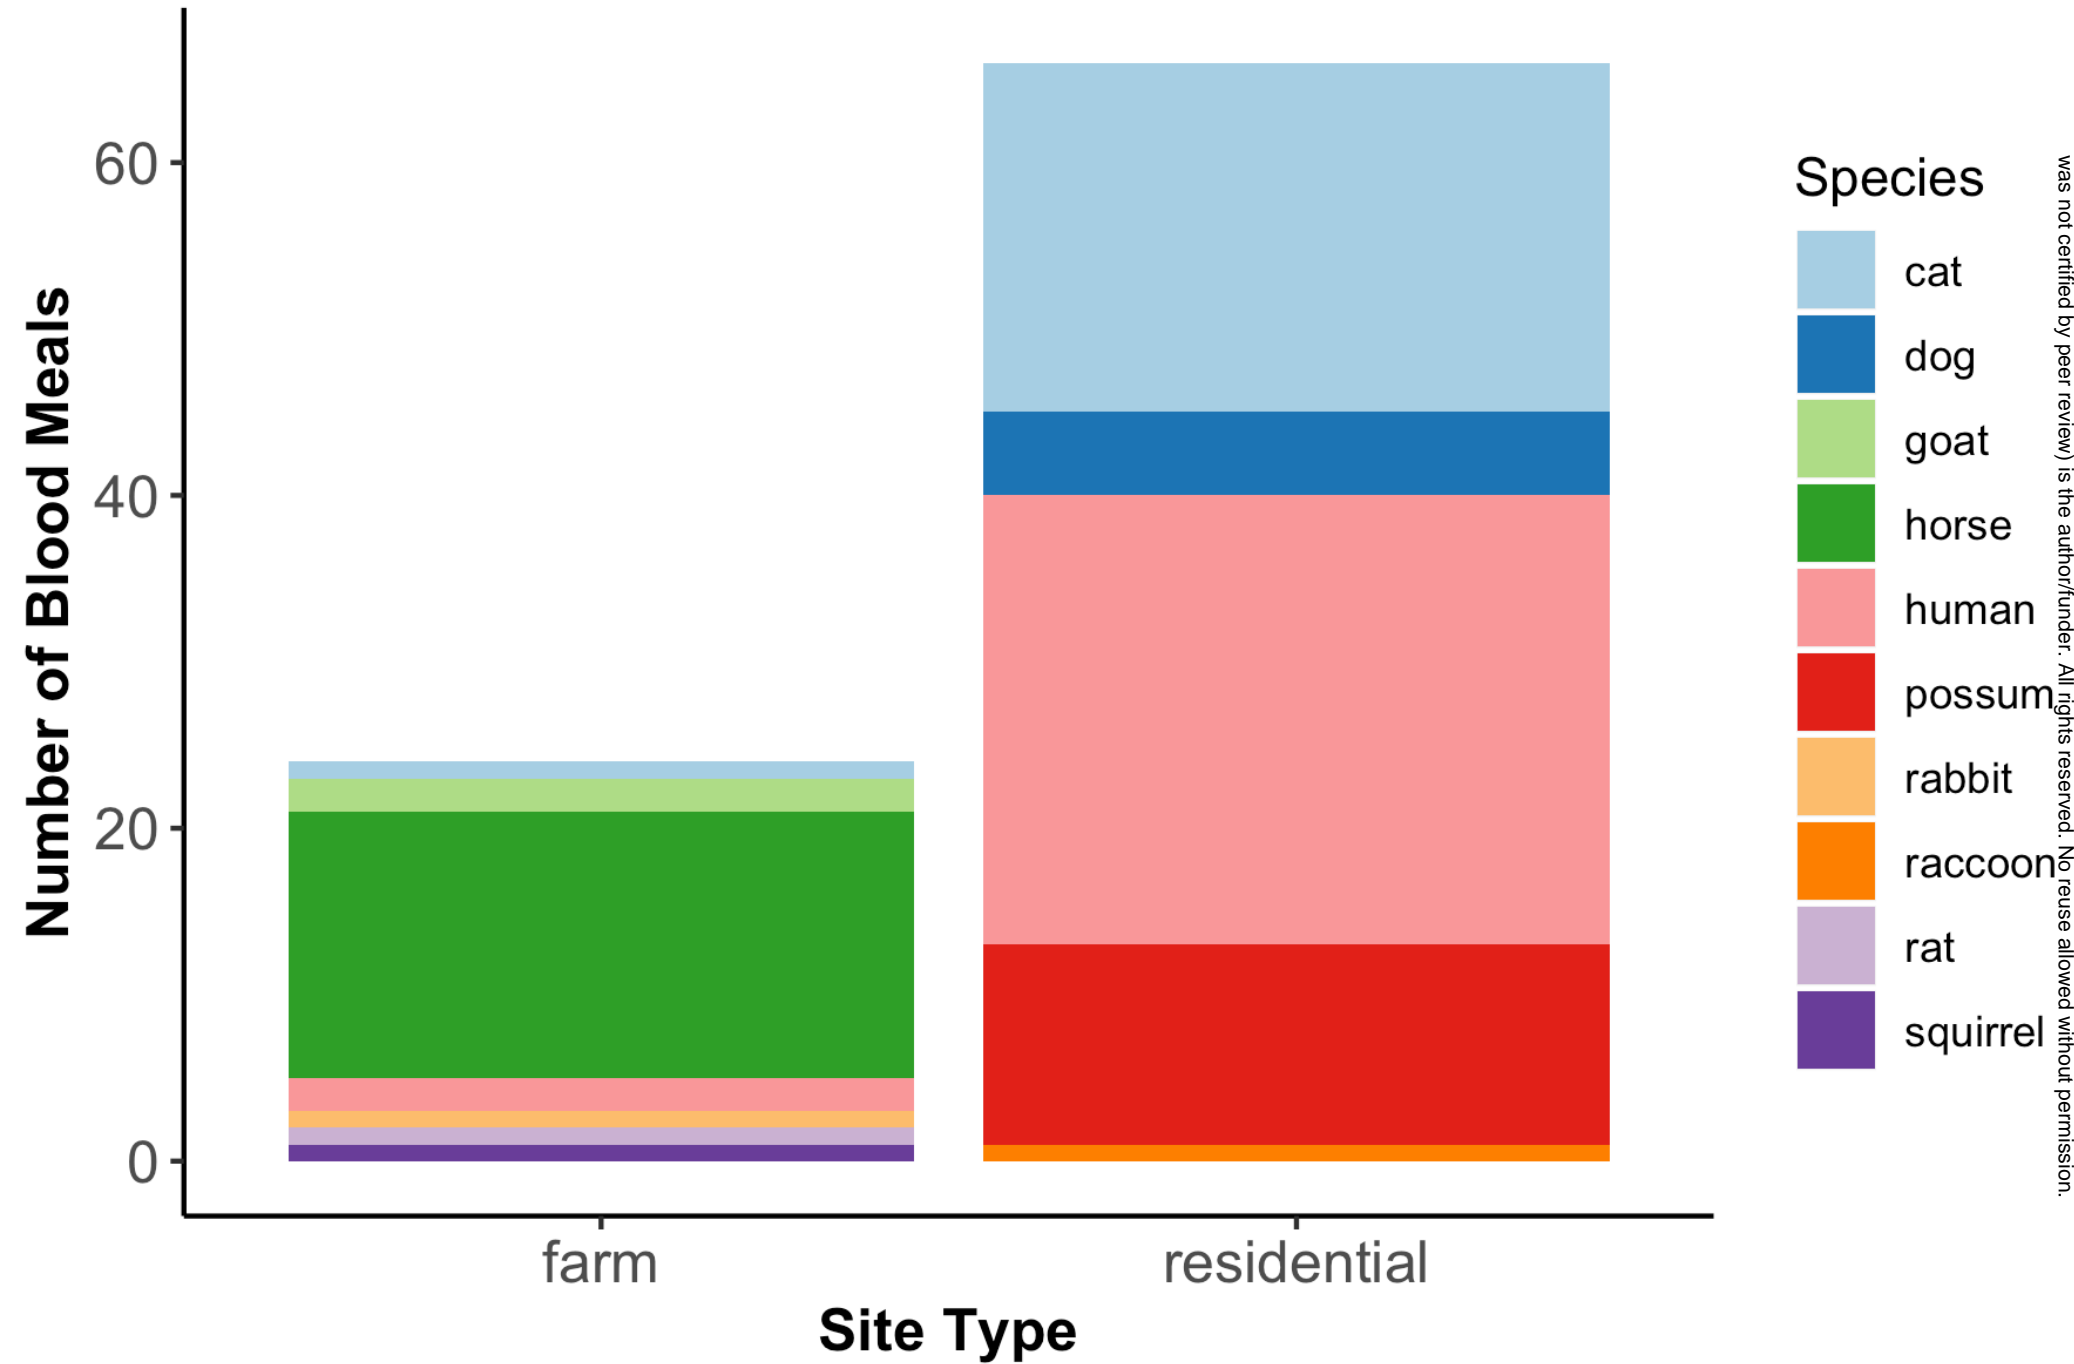

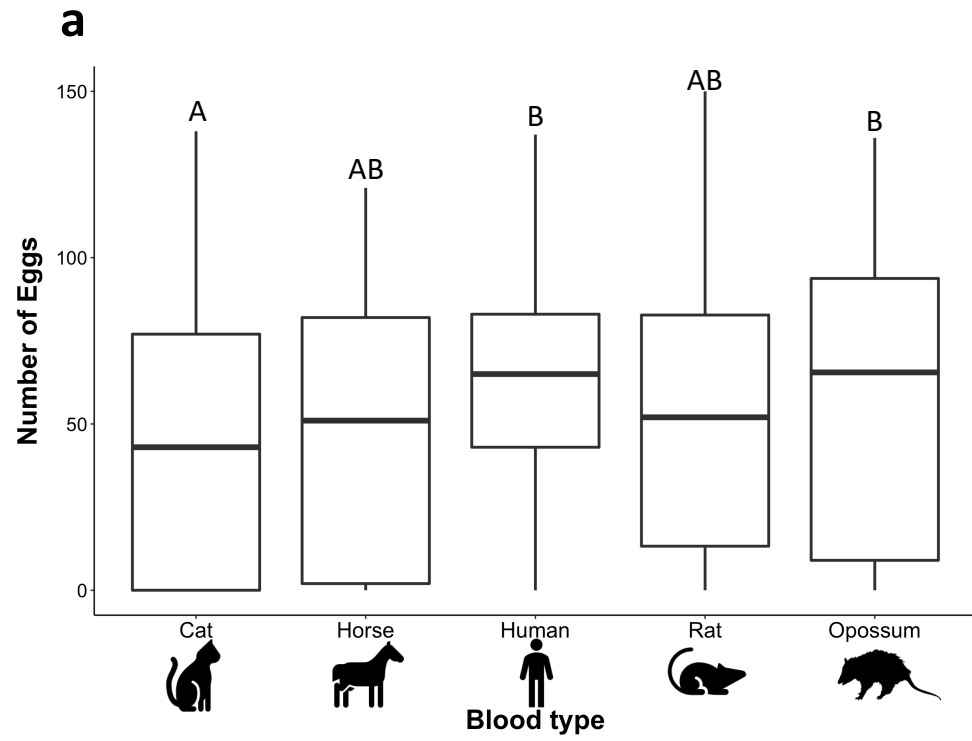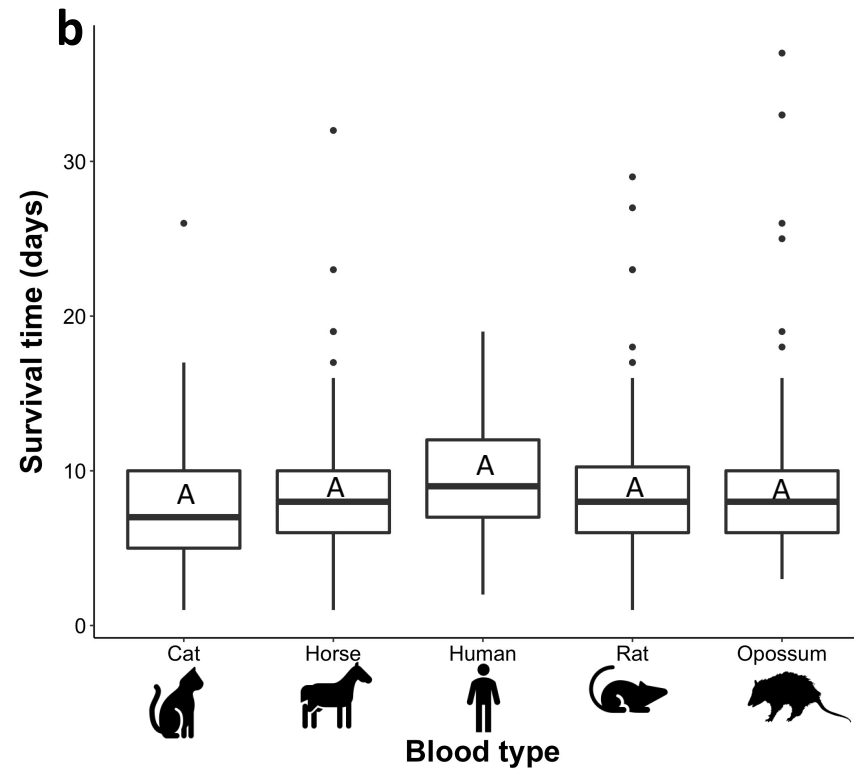

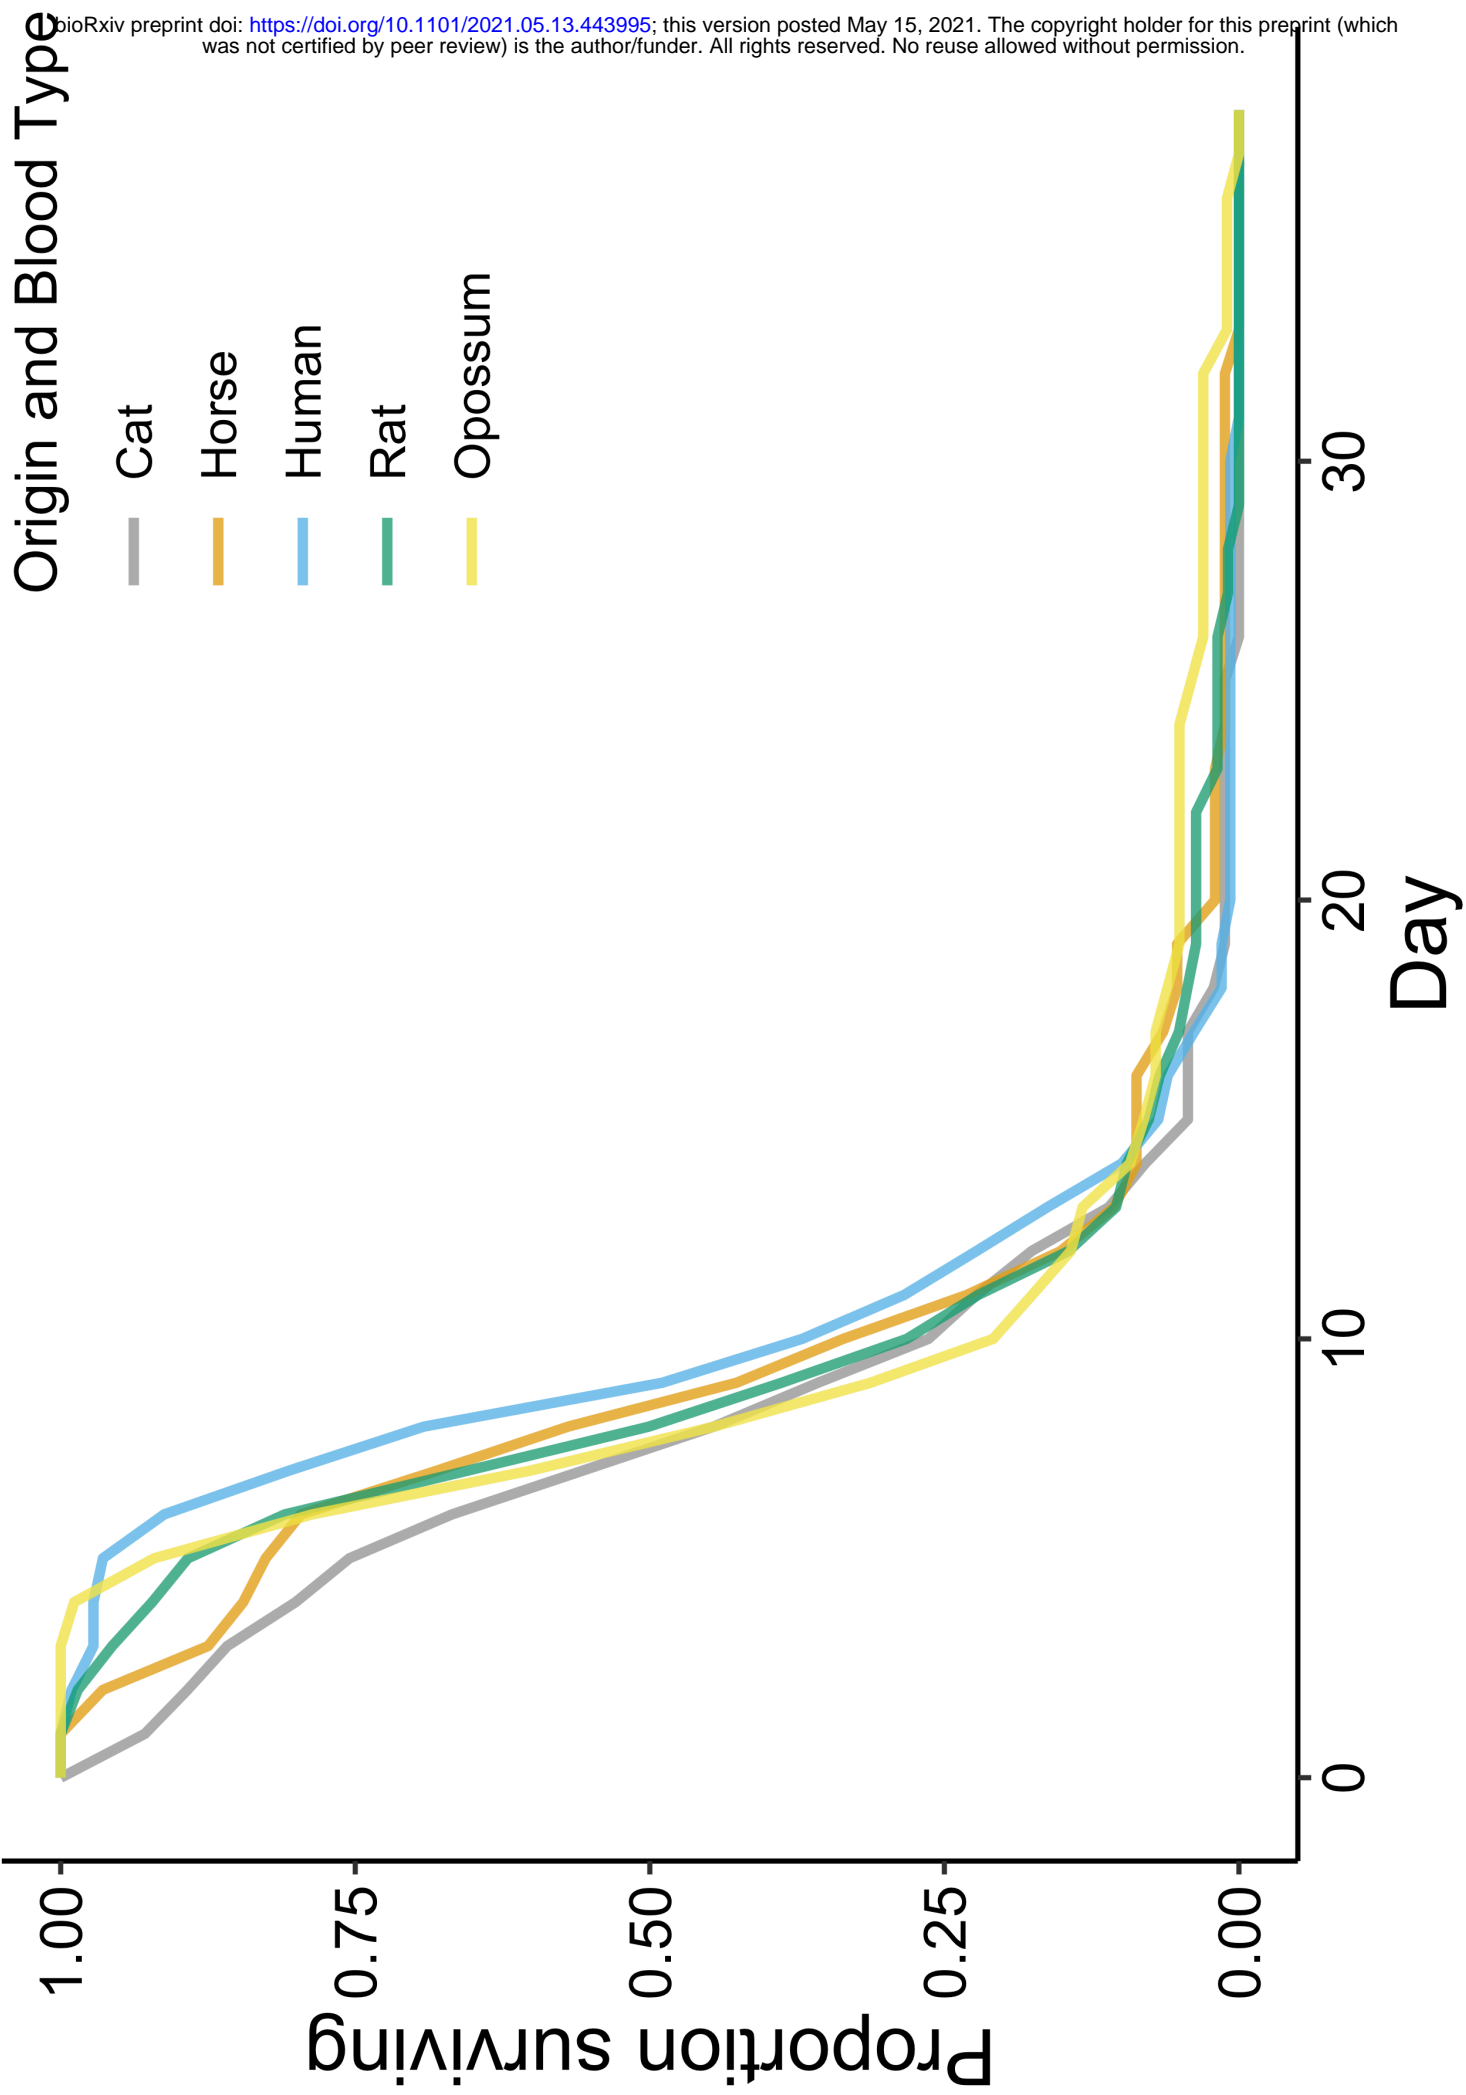

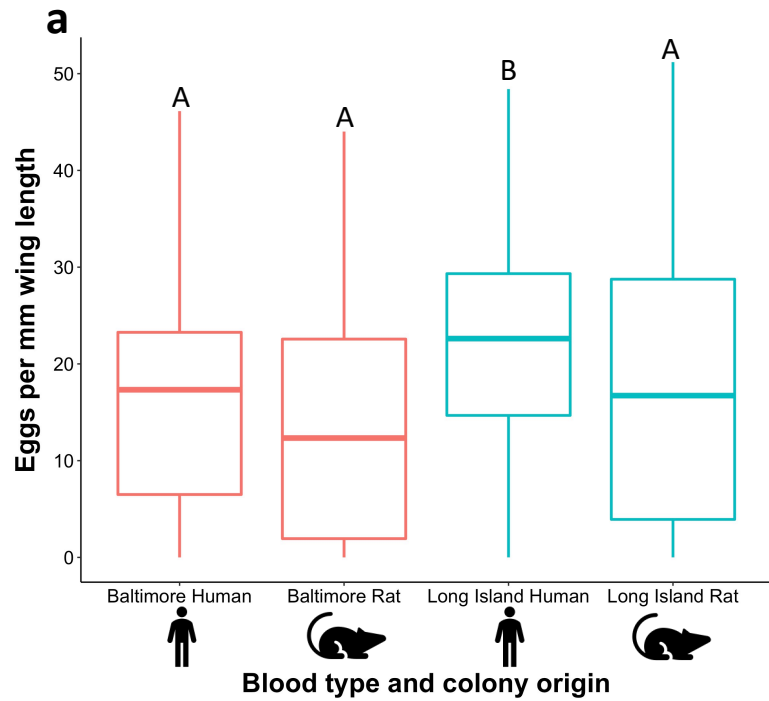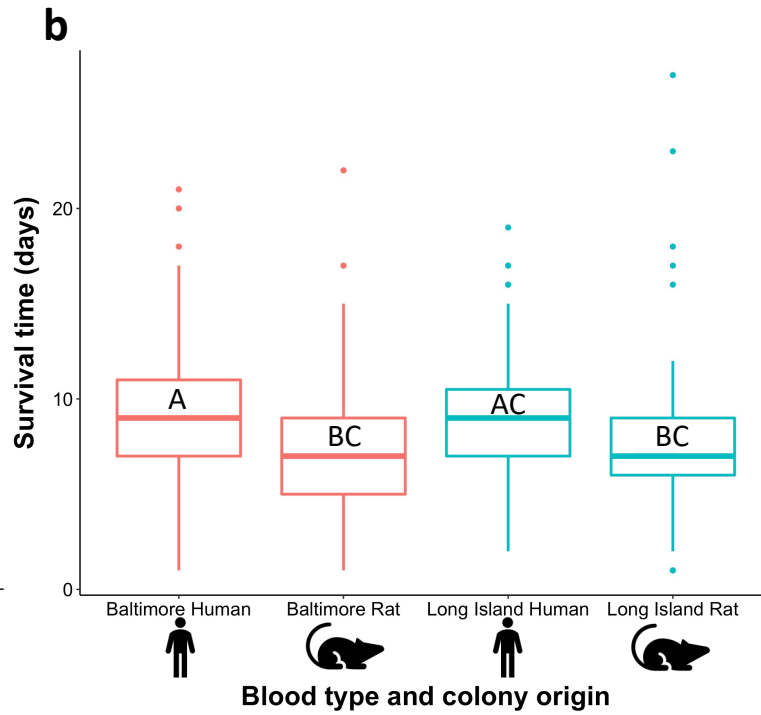

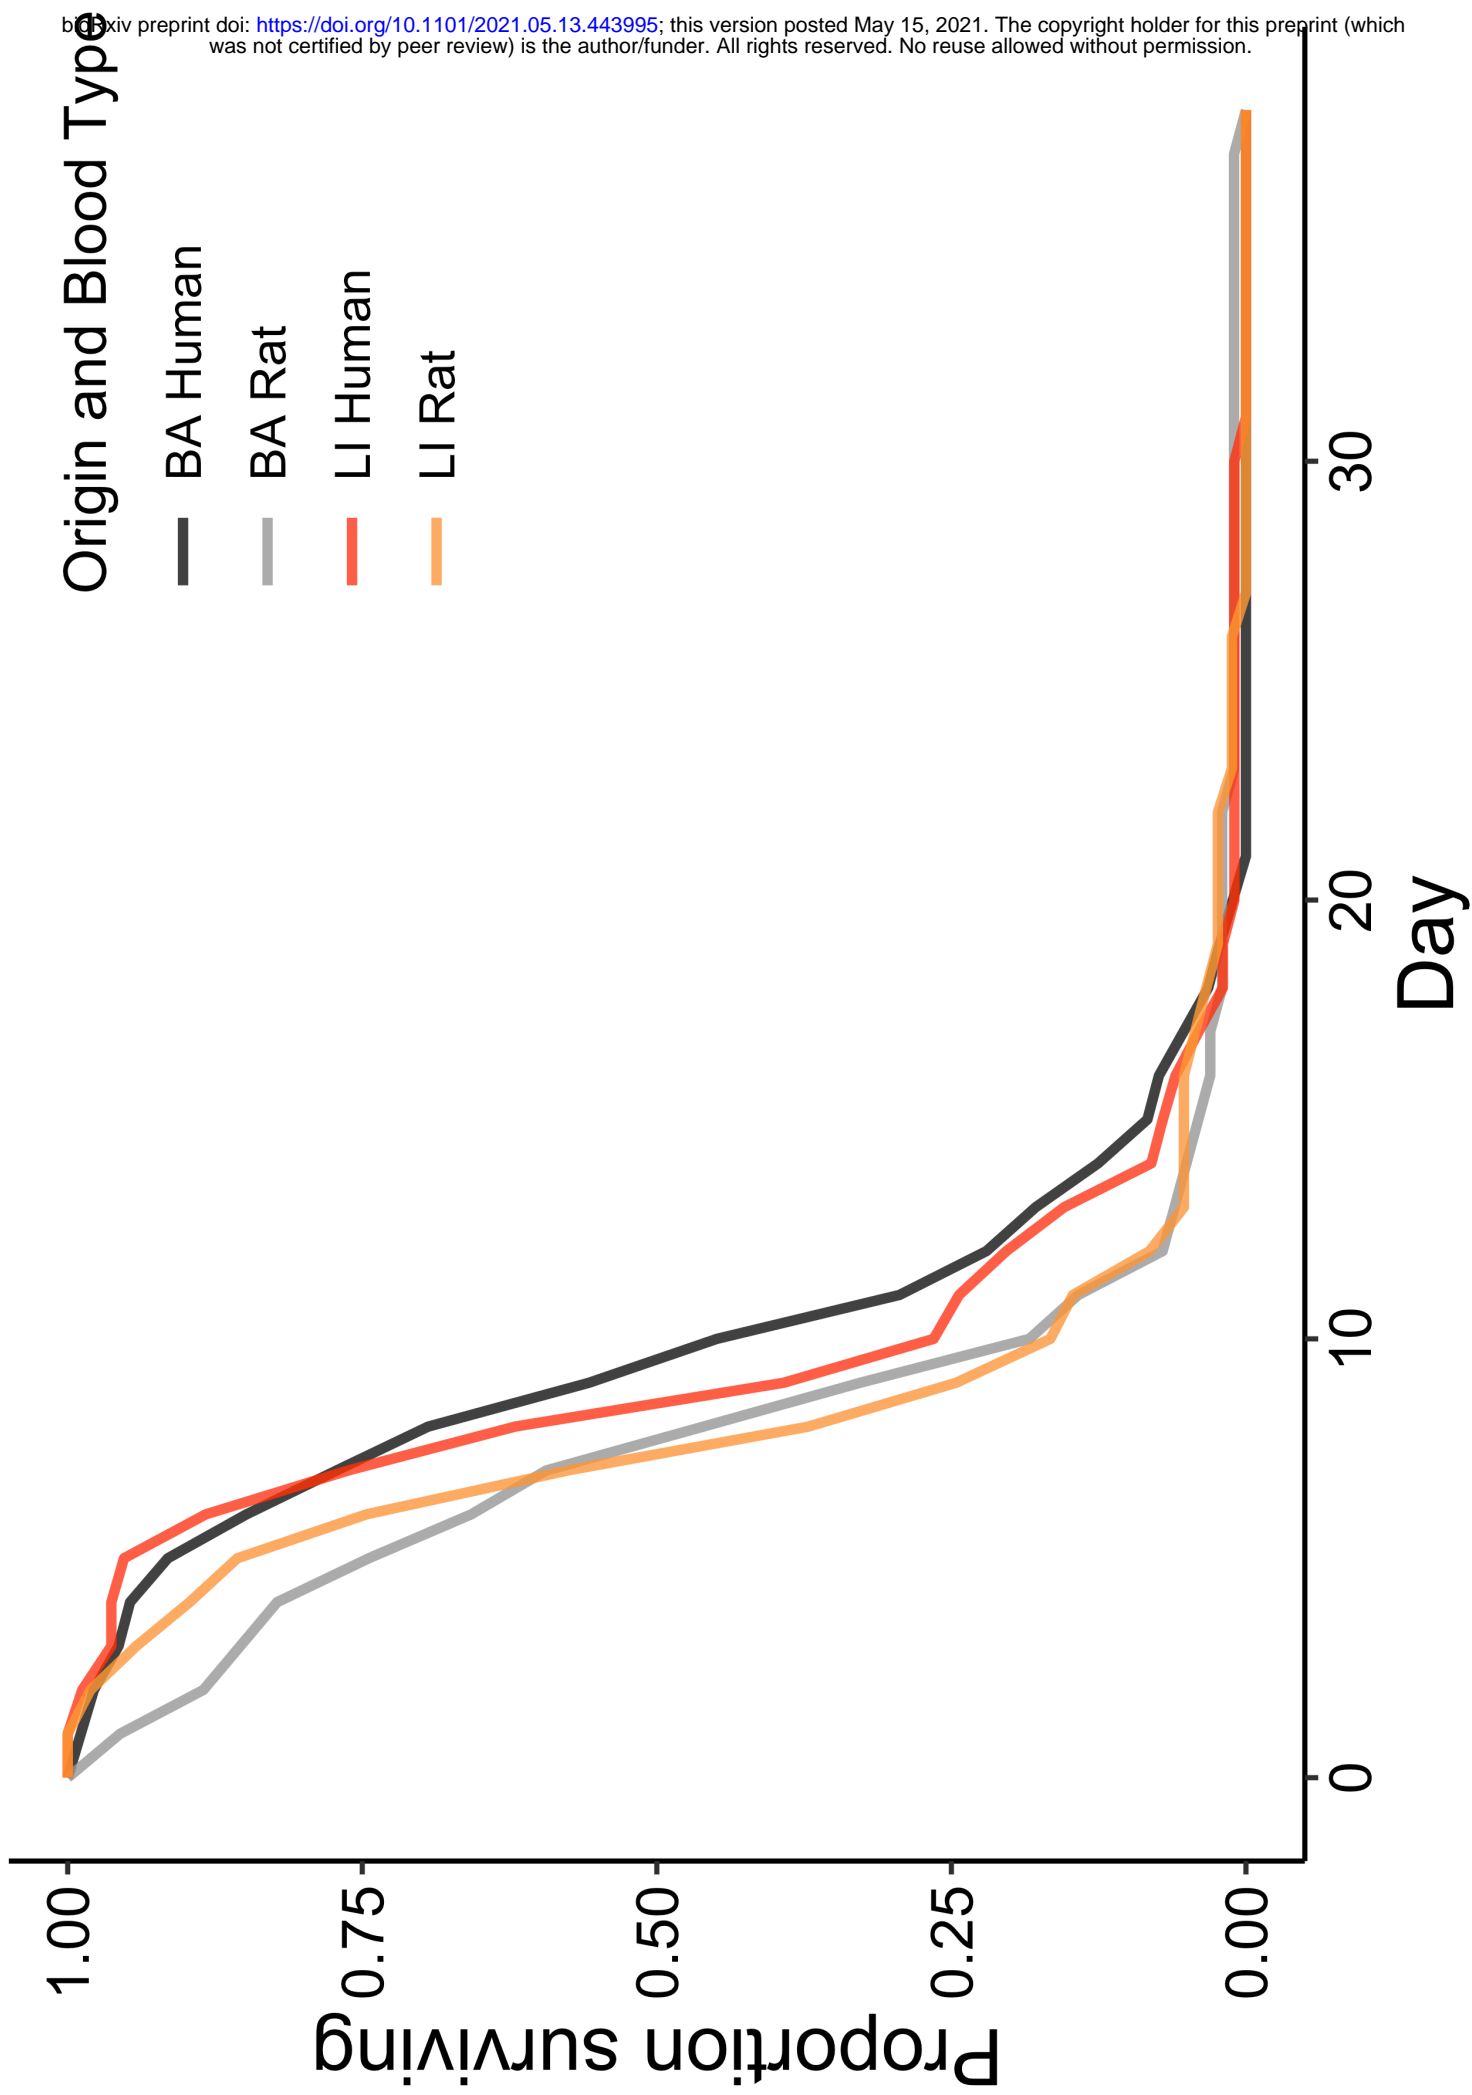

Source: http://biorxiv.org/content/10.1101/2021.05.13.443995v1.full.pdf
